# Supplementary material for: Metaplastic Breast Carcinoma in U.S. Population: Racial Disparities, Survival Benefit of Adjuvant Chemoradiation and Future Personalized Treatment with Genomic Landscape
Source: MDPI journal article supplement (doi:10.3390/cancers15112954), 2023-05-28
Supplement: s1 [file s1]

Supplementary Materials

Metaplastic Breast Carcinoma in U.S. Population: Racial Disparities, Survival Benefit of Adjuvant Chemoradiation and Future Personalized Treatment with Genomic Landscape

**Table S1.** Regional lymph node status and distant metastasis at the time of diagnosis of 5315 patients with metaplastic carcinoma of the breast from the Surveillance, Epidemiology, and End Results (SEER) database, 2000 - 2018.

| Nodal Status (n = 5315)                              |                  | Frequency (%) |
|------------------------------------------------------|------------------|---------------|
| Unknown                                              |                  | 2823 (53.1%)  |
| Known                                                |                  | 2492 (46.9%)  |
| When nodal status was known (n = 2492)               |                  |               |
| Positive lymph nodes                                 |                  | 551 (22.1%)   |
| Negative lymph nodes                                 |                  | 1941 (77.9%)  |
| SEER Metastasis (n = 5315)                           |                  | Frequency (%) |
| Unknown                                              |                  | 2275 (42.7%)  |
| Known                                                |                  | 3040 (57.2%)  |
| Where metastasis was known (n = 3040)                |                  |               |
| No metastasis                                        |                  | 2890 (95.1%)  |
| Bone metastasis only                                 |                  | 27 (0.9%)     |
| Brain metastasis only                                |                  | 8 (0.3%)      |
| Liver metastasis only                                |                  | 8 (0.3%)      |
| Lung metastasis only                                 |                  | 62 (2.0%)     |
| Bone + Brain metastases                              |                  | 1 (0.03%)     |
| Bone + Liver metastases                              |                  | 4 (0.1%)      |
| Bone + Lung metastases                               |                  | 19 (0.6%)     |
| Brain + Lung metastases                              |                  | 4 (0.1%)      |
| Liver + Lung metastases                              |                  | 8 (0.3%)      |
| Bone + Brain + Lung metastases                       |                  | 1 (0.03%)     |
| Bone + Liver + Lung metastases                       |                  | 5 (0.1%)      |
| Brain + Liver + Lung metastases                      |                  | 1 (0.03%)     |
| Combined metastases to bone, brain, liver, and lungs |                  | 2 (0.06%)     |
| Overall Metastasis by Location                       |                  |               |
| Location                                             | Status known (%) | Frequency (%) |
| Bone                                                 | Unknown          | 2271 (42.7%)  |
|                                                      | Known            | 3044 (57.3%)  |
| Brain                                                | Unknown          | 2268 (42.7%)  |
|                                                      | Known            | 3047 (57.3%)  |
| Liver                                                | Unknown          | 2268 (42.7%)  |
|                                                      | Known            | 3047 (57.3%)  |
| Lung                                                 | Unknown          | 2270 (42.7%)  |
|                                                      | Known            | 3045 (57.3%)  |

**Table S2.** Treatment characteristics of 5315 patients with metaplastic carcinoma of the breast from the Surveillance, Epidemiology, and End Results (SEER) database, 2000 - 2018.

| Treatment (n = 5315)                         |  | Frequency (%) |
|----------------------------------------------|--|---------------|
| Unknown                                      |  | 24 (0.5%)     |
| Known                                        |  | 5291 (99.5%)  |
| Where treatment status were known (n = 5291) |  |               |
| No treatment                                 |  | 199 (3.8%)    |
| Surgery only                                 |  | 1509 (28.5%)  |
| Chemotherapy only                            |  | 126 (2.4%)    |
| Radiation only                               |  | 6 (0.1%)      |
| Surgery + Chemotherapy                       |  | 1296 (24.5%)  |
| Surgery + Radiation                          |  | 574 (10.9%)   |
| Chemotherapy + Radiation                     |  | 11 (0.2%)     |

|                                                          |              |
|----------------------------------------------------------|--------------|
| Combination therapy (Surgery + Chemotherapy + Radiation) | 1568 (29.6%) |
|----------------------------------------------------------|--------------|

**Table S3.** Survival data of 5315 patients with Metaplastic carcinoma of the breast from the Surveillance, Epidemiology, and End Results (SEER) database, 2000 - 2018.

| Survival | Overall Survival% (C.I. 95%) | Cause specific survival% (C.I. 95%) | Chemotherapy% (C.I. 95%) | Surgery% (C.I. 95%) | Radiation% (C.I. 95%) | Surgery + Chemotherapy (C.I. 95%) | Surgery + Radiation % (C.I. 95%) | Combined Chemotherapy, surgery, and Radiation (C.I. 95%) |
|----------|------------------------------|-------------------------------------|--------------------------|---------------------|-----------------------|-----------------------------------|----------------------------------|----------------------------------------------------------|
| 1 year   | 88.4% (87.3-89.3)            | 90.1% (89.2-91.0)                   | 92.2% (91.1-93.2)        | 92.7% (91.8-93.5)   | 96.0% (95.0-96.8)     | 93.9% (92.8-94.8)                 | 96.1% (95.1-96.9)                | 96.8% (95.7-97.7)                                        |
| 2 years  | 77.9% (76.6-79.2)            | 81.4% (80.2-82.6)                   | 82.7% (81.1-84.2)        | 84.1% (82.8-85.2)   | 89.1% (87.5-90.6)     | 84.5% (82.9-86.0)                 | 89.4% (97.8-90.8)                | 89.2% (87.3-90.8)                                        |
| 3 years  | 71.4% (69.9-72.8)            | 76.2% (74.8-77.5)                   | 77.6% (75.8-79.3)        | 78.8% (77.4-80.1)   | 83.6% (81.7-85.4)     | 79.4% (77.6-81.1)                 | 83.9% (81.9-85.6)                | 83.3% (80.9-85.3)                                        |
| 4 years  | 67.1% (65.5-68.6)            | 73.1% (71.6-74.5)                   | 74.3% (72.4-76.1)        | 75.7% (74.2-77.1)   | 80.5% (78.4-82.5)     | 76.3% (74.3-78.1)                 | 80.8% (78.7-82.7)                | 79.8% (77.3-82.1)                                        |
| 5 years  | 63.6% (62.0-65.1)            | 71.1% (69.5-72.6)                   | 72.6% (70.6-74.5)        | 73.6% (72.0-75.1)   | 78.7% (76.5-80.7)     | 74.5% (72.5-76.4)                 | 79.0% (76.7-81.0)                | 78.1% (75.4-80.4)                                        |

**Table S4.** Survival by race data of 5315 patients with metaplastic carcinoma of the breast from the Surveillance, Epidemiology, and End Results (SEER) database, 2000 - 2018.

| Survival | White% (C.I. 95%) | Black% (C.I. 95%) | Asian or Pacific Islander% (C.I. 95%) | American Indian or Alaska Native% (C.I. 95%) |
|----------|-------------------|-------------------|---------------------------------------|----------------------------------------------|
| 1 year   | 90.3% (89.2-91.3) | 88.8% (86.1-91.0) | 91.6% (87.3-94.4)                     | 85.0% (59.7-91.5)                            |
| 2 years  | 82.3% (80.9-83.7) | 76.4% (72.8-79.6) | 83.9% (78.4-88.1)                     | 69.1% (43.6-84.8)                            |
| 3 years  | 77.6% (76.0-79.1) | 69.2% (65.2-72.8) | 77.1% (70.8-82.2)                     | 69.1% (43.6-84.8)                            |
| 4 years  | 74.3% (72.6-75.9) | 65.9% (61.8-69.7) | 76.5% (70.2-81.7)                     | 69.1% (43.6-84.8)                            |
| 5 years  | 72.4% (70.7-74.1) | 63.2% (58.9-67.1) | 75.2% (68.7-80.6)                     | 63.3% (37.9-80.6)                            |
